# Supplementary material for: Retrospective Cohort Evaluation of Renal Involvement in Non-HIV Castleman Disease Patients from a Single Academic Center in Beijing, China
Source: Research Square preprint supplement (doi:10.21203/rs.3.rs-8030031/v1), 2025-11-21
Supplement: Supplementary file 1 [file 803bd35b08c773aee571022f.xlsx]

## Sheet: Sheet1
Supplement Table 1. Baseline characteristics of MCD patientsa
	MCD	MCD-non-RI	MCD-RI	P值
	（n=67）	（n=30）	（n=37）
Gender, male (%)	36（53.7%）	14（46.7%）	22（59.5%）	0.296
Age (range)	48（10-70）	45（10-68）	52（15-70）	0.233
Diagnosis time of onset, months	7（2.3-25）	10（4.5-34.5）	4（2-21）	0.15
Pathological subtype				0.029
HV (%)	14（20.9%）	8（26.7%）	6（16.2%）
PC (%)	33（49.3%）	18（60%）	15（40.5%）
Mix (%)	20（29.9%）	4（13.3%）	16（43.2%）
Clinical subtype				＜0.001
aMCD (%)	11（16.4%）	11（36.7%）	0
iMCD-NOS (%)	30（44.8%）	13（43.3%）	17（45.9%）
iMCD-IPL (%)	7（10.4）	6（20%）	1（2.7%）
iMCD-TAFRO (%)	19（28.4%）	0	19（51.4%）
aaMCD, asymptomatic MCD; iMCD-NOS, idiopathic MCD-not otherwise specified; iMCD-IPL, idiopathic MCD-idiopathic plasmacytic lymphadenopathy; iMCD-TAFRO, idiopathic MCD-thrombocytopenia, anasarca, fever, reticulin fibrosis, and organomegaly.
Supplement Table 2. Comparative clinical presentations between MCD-RI patients and MCD-non-RI patients
	MCD-RI	MCD-non-RI	P值
	（n=37）	（n=30）
Symptom
Fever	5（13.5%）	8（26.7%）	0.176
Fatigue	27（73%）	5（16.7%）	＜0.001
Night sweat	4（10.8%）	2（6.7%）	0.684
Loss of appetite	24（64.9%）	5（16.7%）	＜0.001
Weight loss	8（21.6%）	7（23.3%）	0.867
Physical sign
Hepatomegaly	6（16.2%）	2（6.7%）	0.281
Splenomegaly	13（35.1%）	5（16.7%）	0.09
Hydrothorax	21（56.8%）	2（6.7%）	＜0.001
Ascites	24（64.9%）	1（3.3%）	＜0.001
Erythra	2（5.4%）	3（10%）	0.65
Supplement Fig. 1 Upset diagram of urinary system symptoms in MCD-RI patients
